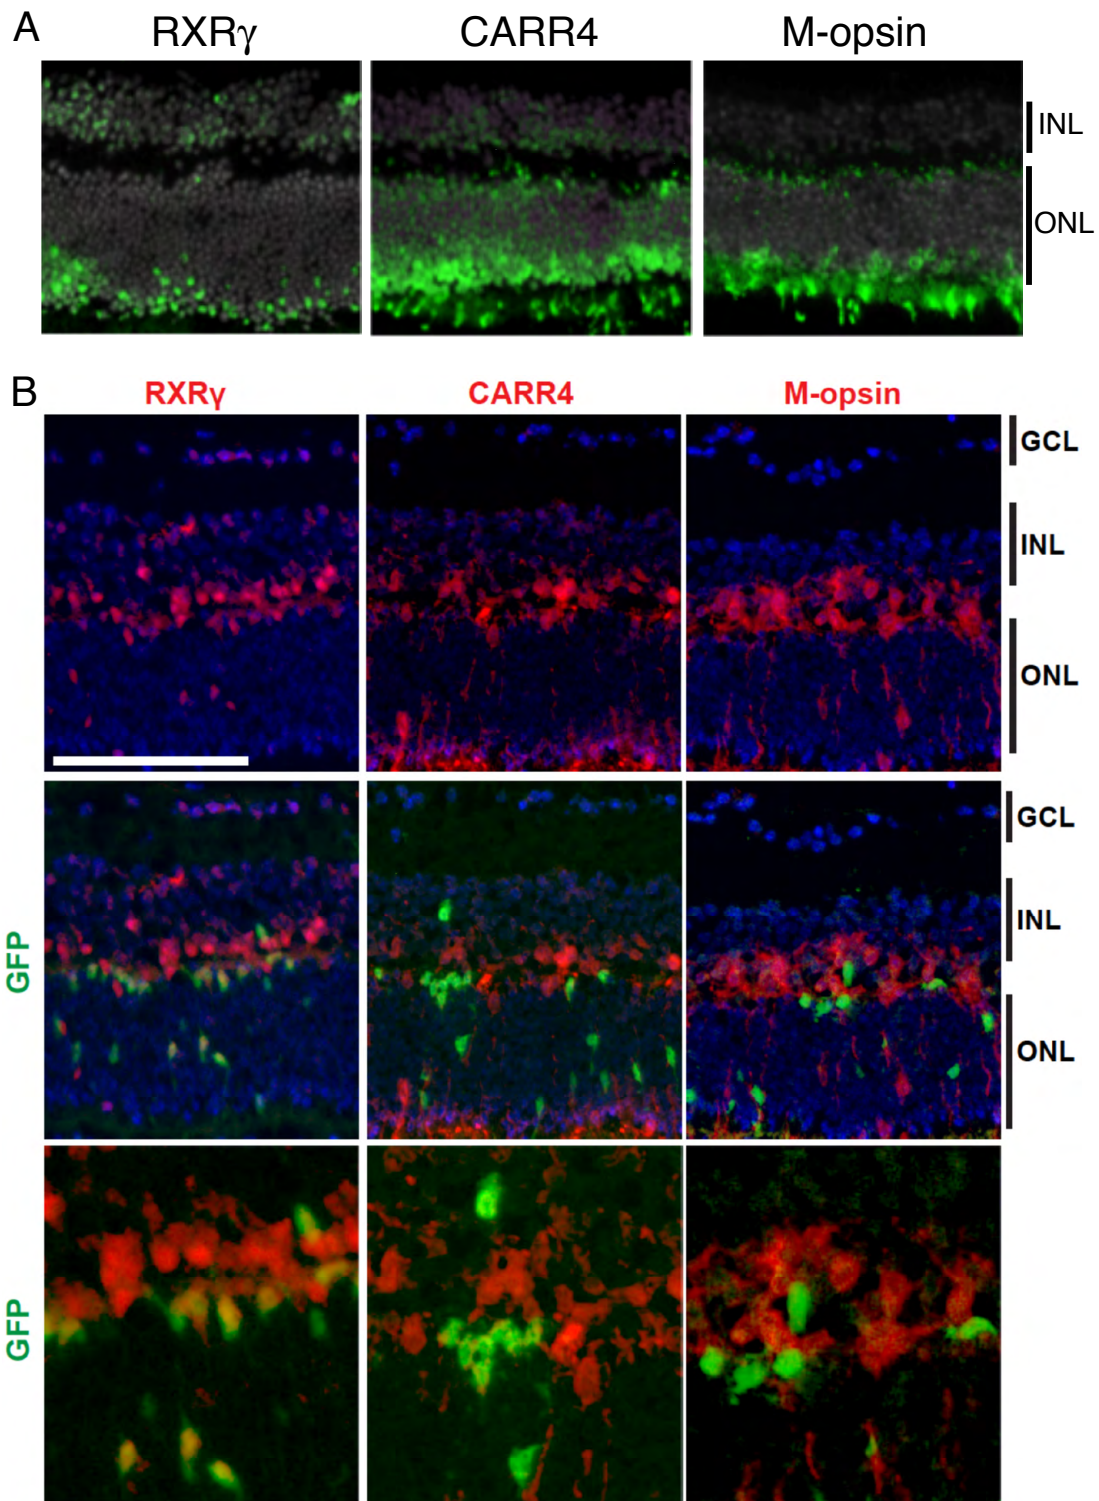

**Fig. S1. Immunostaining of Sox11/Sox4 overexpressed retinal sections by antibodies anti-M-opsin and CARR4.** (A) Frozen sectioned adult retina was immunostained with indicated antibodies. Nucleus was stained with DAPI and expressed in gray. (B) Mouse retina at E17 was transfected with Sox11-EGFP, cultured as an explant for 2 weeks and then frozen sectioned. Immunostaining using anti-EGFP, RXR $\gamma$ , CARR4 and M-opsin was carried out. Nucleus was stained with DAPI and expressed in blue. CARR4 and M-opsin antibodies recognized cells in the border between INL and ONL, confirming that these cells are cone. However, although RXR $\gamma$  merged with EGFP-positive cells, CARR4 and M-opsin antibodies did not merge with the cells. These results suggest that the cells are of the cone lineage but did not achieve final maturation.

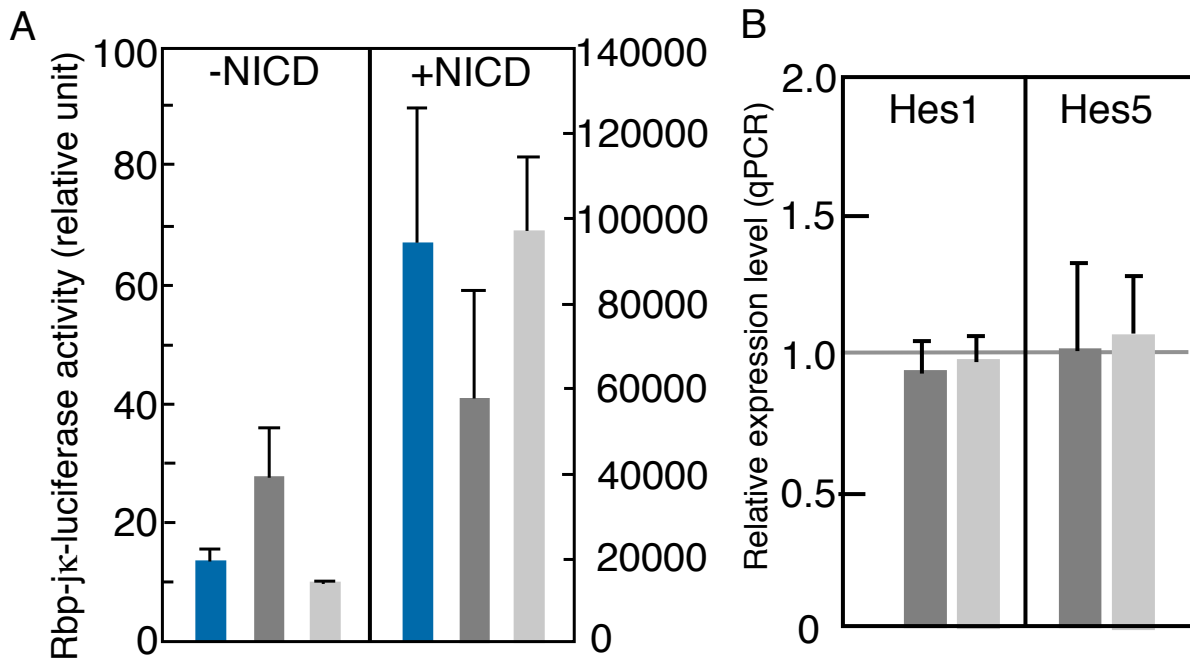

**Fig. S2. Effects of Sox11 and Sox4 for Notch signaling.** (A) Effects of Sox11 and Sox4 on Notch signaling were examined by luciferase analysis. Y79 cells were transfected with Rbp-jk-luciferase plasmid with pCAG-Sox11, pCAG-Sox4 or control pCAG, and pEF-NICD or control pEF plasmids. After 48 hours, luciferase activities were measured. (B) Retrovirus encoding Sox11-, Sox4-IRES-EGFP or control EGFP was transduced into retinal explants at E16 prepared from ICR mice. On the fourth day, the expression of Hes1 and Hes5 was examined by qPCR. Expression levels relative to values of control plasmid transfected samples are shown.

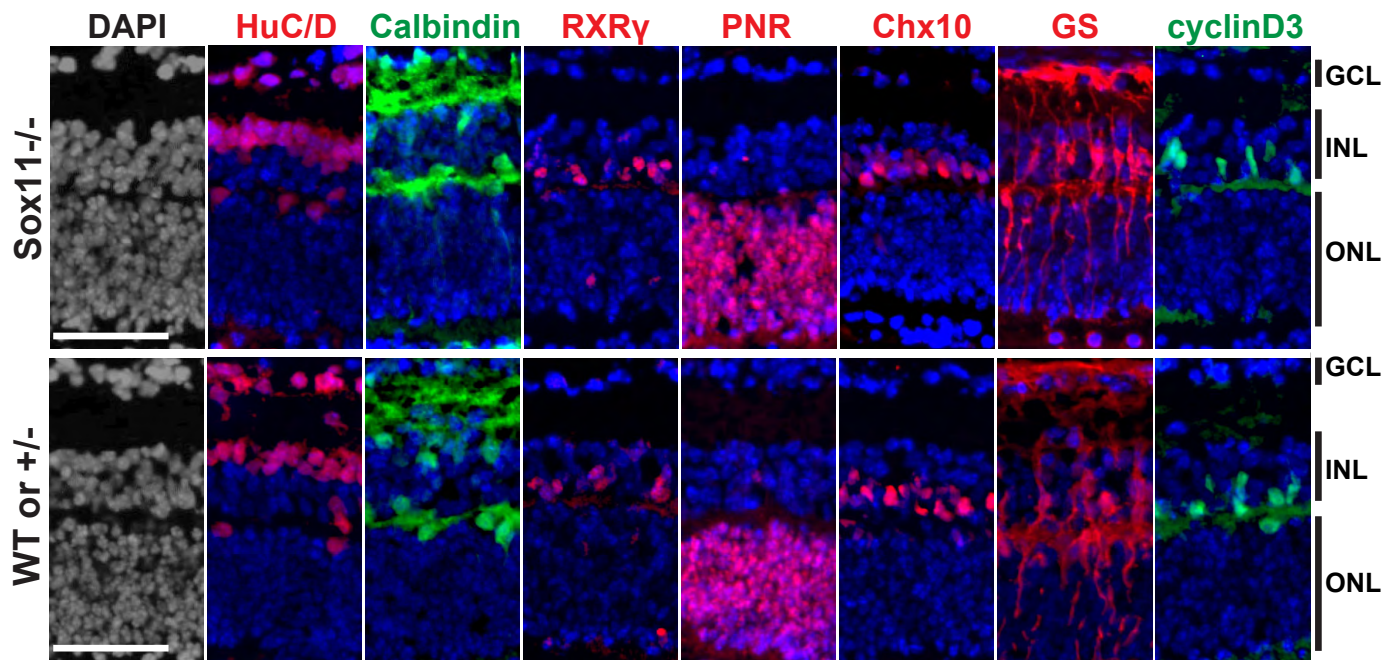

**Fig. S3. The late phase of retinal differentiation was correct in Sox11-KO retinas.** Retinas of Sox11-KO or control mice were isolated at E18 and cultured as explant cultures for 2 weeks. Retinas were harvested and frozen sectioned. The indicated markers were immunostained. Nuclei were visualized with DAPI. GCL, ganglion cell layer; INL, inner nuclear layer; ONL, outer nuclear layer. Scale bars: 50  $\mu$ m.

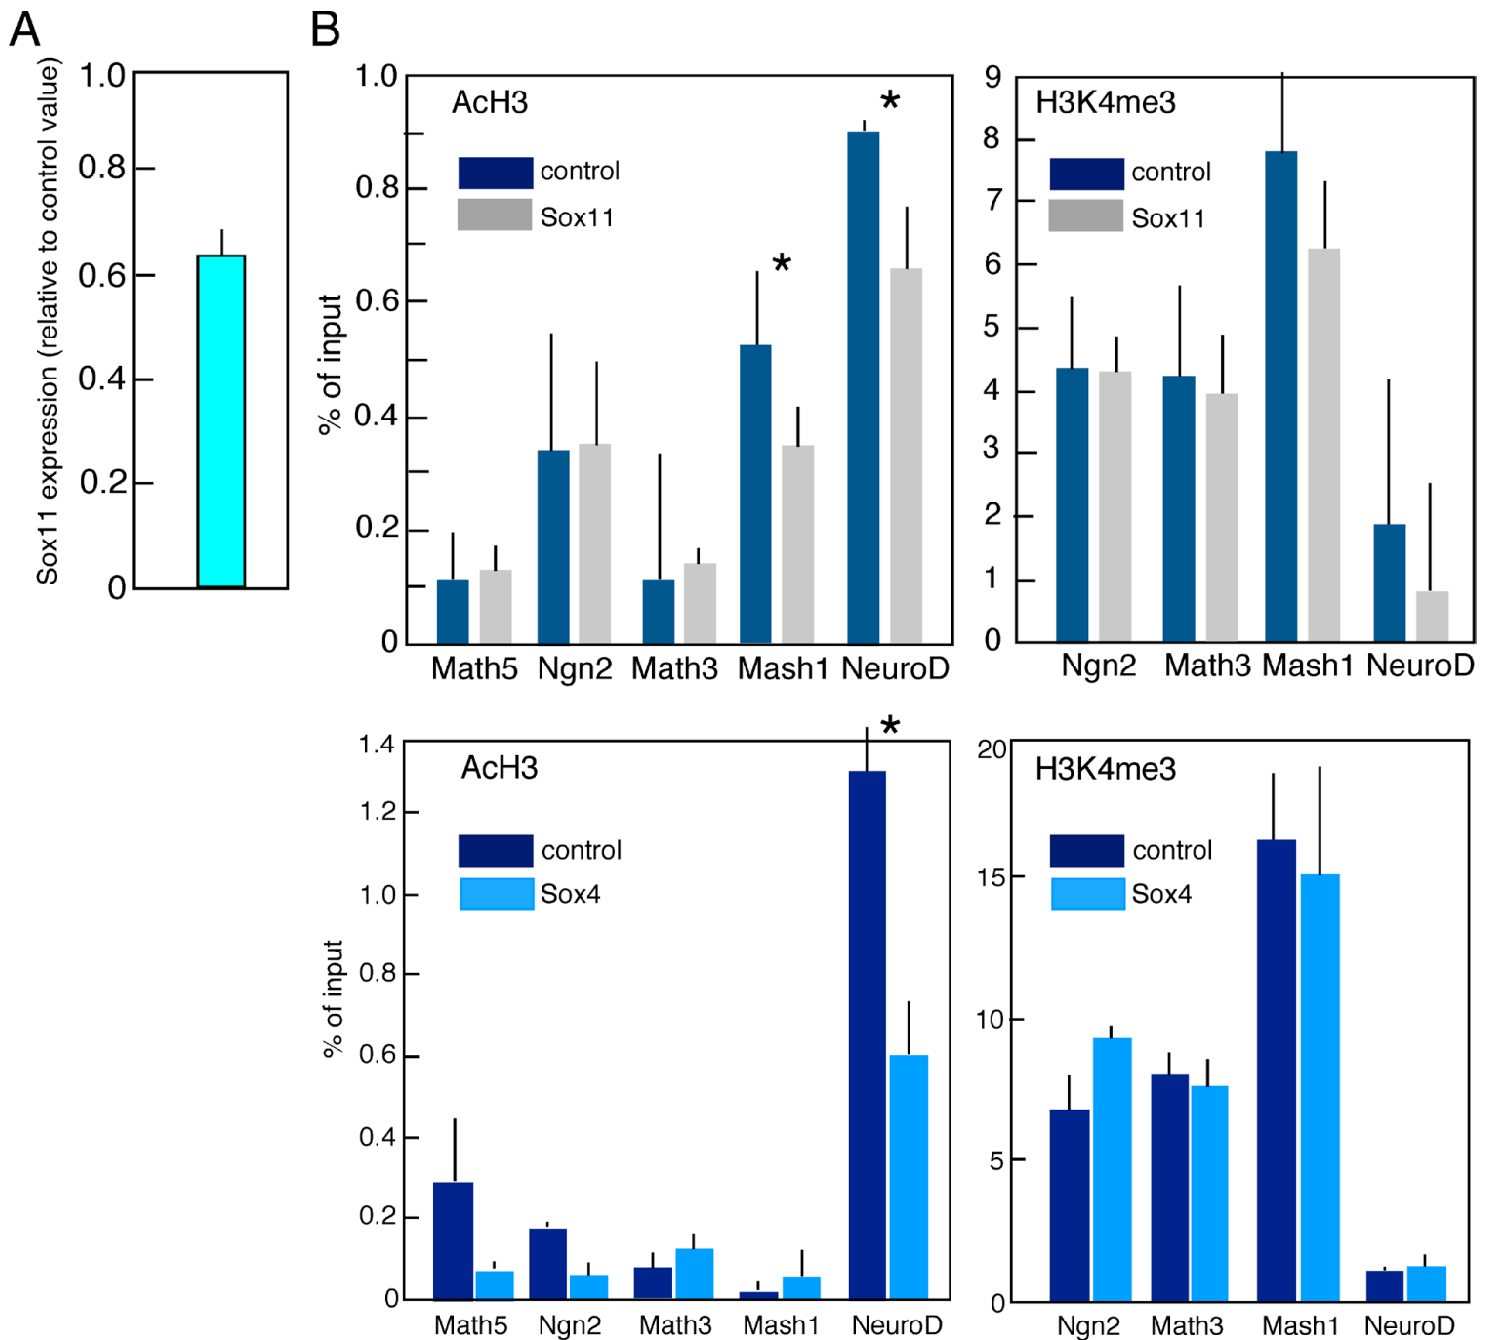

**Fig. S4. Effects of Sox11 or Sox4 overexpression for histone modification of genes.** (A) Effects of sh-Sox11 on expression levels of Sox11 in retina. Electroporation of sh-Sox11 was carried out using retinas at E15, and the retina was cultured for 3 days. Expression levels of Sox11 were examined by qPCR. Results are average of four independent samples  $\pm$ s.d. (B) Effects of Sox11 or Sox4 overexpression on the histone modification of genes. Expression plasmid of Sox11-EGFP or Sox4-EGFP was introduced into retina ( $\sim$ 20 retinas for one sample) at E15 by electroporation, and retinas were cultured for 2 days as explants. Retinas were then treated with trypsin to dissociate into single cells, and EGFP-positive cells were purified using a cell sorter and  $\sim 1 \times 10^6$  purified cells were served for each ChIP sample. Modification of AcH3 and H3K4me3 levels in Math5, Ngn2, Math3, Mash1 and NeuroD enhancer region was analyzed by ChIP analysis. We repeated the same design of experiments at least three times, but some of results were not stable. By repeated experiments, reproducible results are shown in this figure. \* $P < 0.05$ .

Table S1. Antibodies

***Primary antibodies***

Mouse monoclonal antibodies

$\beta$ III tubulin (Covance)  
PNR (ppmx)  
glutamine synthetase (GS, Chemicon)  
HuC/D (Molecular Probes)  
Ki67 (BD Bioscience)  
BrdU (Roche)  
kip1/p27(BD Bioscience)  
NF160 (Sigma Aldrich)  
Cyclin D3 (Santa Cruz)  
 $\beta$ -galactosidase (DSHB)  
Islet-a (DSHB)

Rabbit polyclonal antibodies

GFP (Clontech)  
 $\beta$ -galactosidase (Cappel)  
Sox4 (Abcam)  
Calbindin D28K (Millipore)  
Phospho histone H3 (Upstate)  
RXR $\gamma$  (Santa Cruz Biotechnology)  
Active Caspase 3 (Promega)  
Cone Arrestin 4 (Dr. Cheryl Craft, USC)  
M-opsin (Dr. Cheryl Craft, USC)  
Histone H3 (AcH3) antibody (Millipore)  
Histone H3 tri-methyl Lys4 (H3K4me3) antibody (Activemotif)  
rabbit control IgG (Santa Cruz)

Rat monoclonal antibody

GFP (Nakarai)

Sheep polyclonal antibody

Chx10 (Exalpha)

Goat polyclonal antibody

Brn3b (Santa Cruz Biotechnology)

Chicken polyclonal antibody

GFP (abcam)

***Secondary antibodies***

Alexa Fluor 488 goat anti-chicken IgG (H+L) (Invitrogen Molecular Probes)  
Alexa Fluor 680 goat anti-mouse IgG (H+L) (Invitrogen Molecular Probes)  
Alexa Fluor 568 goat anti-rabbit IgG (H+L) (Invitrogen Molecular Probes)

Table S2. Primers

**RT-PCR**

G3PDH: 5'-tgaccacagtcctatgccatc-3' and 5'-cataccaggaaatgagcttgac-3'  
Sox11: 5'-tgaaactcgggtgcccaacag-3' and 5'-atcgcggcttaaaggtccc-3'  
Sox4: 5'-gagcttaggggagcattggc-3' and 5'-gctgcaaggacaaggggaaa-3'  
 $\beta$ III tubulin: 5'-gctgtccgcctgcctttt-3' and 5'-gacctcccagaacttgccc-3'  
Math5: 5'-caggacaagaagctg-3' and 5'-gggtctacctggagcc-3'  
Hes1: 5'-atccgcagcaaactgcaaga-3' and 5'-ggacactgtgtgggacctta-3'  
Hes5: 5'-cttctgcgaagtctctggtc-3' and 5'-atgtggacctgaggtgagg-3'  
Math3: 5'-atcagggtcctgaagagtc-3' and 5'-gttccttgccagtcgaagag-3'  
Mash1: 5'-aacaaccagacagccaacc-3' and 5'-aggaacctctgtgattcg-3'  
NeuroD: 5'-caaagccacggatcaatctt-3' and 5'-cccgggaatagtgaactga-3'  
Ngn2: 5'-tcgccagggactgtatct-3' and 5'-ctgtgaagtggagtcg-3'

**ChIP analysis**

Primers for ChIP were designed around transcription start site

Math5: 5'-atccgcagcaaactgcaaga-3', 5'-ggacactgtgtgggacctta-3'  
Ngn2: 5'-gattgtttcttggtggtatataagg-3', 5'-gactccaaggcactccagttaaa-3'  
Math3: 5'-aggaggtgtgtctttaggct-3', 5'-cagctcctgtgatctgactg-3'  
Sox11: 5'-tgaggcccggtggttaataac-3', 5'-tgagggtctctctcaactcg-3'  
Sox4: 5'-cttctcattgcacgcggaga-3', 5'-cagccgctgtaactaacgct-3'  
Mash1: 5'-cagcagtctctcacttctgg-3', 5'-tgagcctgcttctgggatta-3'  
NeuroD: 5'-acagatgggccactttcttc-3', 5'-atatggtcttcccgggtccag-3'  
Fbxo: 5'-ggaggaggaaagctccgata-3', 5'-aggaggacatatggagtcgg-3'  
Adi1: 5'-gccttctctctctgaatt-3', 5'-ttccactaactggctggaag-3'

Table S3. Comparison of expression level of members of SoxC group in different subsets of retinal progenitor cells

| <b>Gene</b> | <b>Probe No</b> | <b>Unigene No.</b> | <b>SSEA1+(E14)</b> | <b>c-kit-(P1)</b> | <b>ckit+(P1)</b> |
|-------------|-----------------|--------------------|--------------------|-------------------|------------------|
| Sox11       | 1426790_a_at    | Mm.41702           | 715.0              | 309.2             | 229.5            |
| Sox4        | 1419155_a_at    | Mm.240627          | 307.3              | 1471              | 1061.8           |
| Sox12       | 1456882_at      | Mm.28424           | 10.1               | 6.8               | 5.0              |

Table S4. Expression levels of members of SoxC group in retinal explant cultures

| <b>Gene</b> | <b>Probe No</b> | <b>Unigene No.</b> | <b>E15</b> | <b>5 days cultured</b> |
|-------------|-----------------|--------------------|------------|------------------------|
| Sox11       | 1426790_a_at    | Mm.41702           | 486.1      | 246.7                  |
| Sox4        | 1419155_a_at    | Mm.240627          | 1082.7     | 1607.3                 |
| Sox12       | 1456882_at      | Mm.28424           | 2.9        | 8.0                    |



Table S5. Genes downregulated and upregulated in Sox11 knockout retina compared with littermate wild-type retina at E16  
Genes are listed from smallest (Table 5A) and largest (Table 5B) fold change; the top 30 genes are shown.

A

| Probe-set    | Accession No. | Unigene   | Gene                                                    | WT signal | KO signal | Fold change |
|--------------|---------------|-----------|---------------------------------------------------------|-----------|-----------|-------------|
| 1450813_a_at | NM_021467     | Mm.44379  | troponin I, skeletal, slow 1                            | 33.4      | 2         | 0.06        |
| 1423232_at   | X63190        | Mm.5025   | ets variant gene 4 (E1A enhancer binding protein, E1AF) | 22.3      | 2.1       | 0.08        |
| 1431225_at   | BB656631      | Mm.466344 | SRY-box containing gene 11                              | 3205.7    | 252.4     | 0.08        |
| 1438648_x_at | AV069898      | Mm.46387  | gastrokine 3                                            | 29        | 1.8       | 0.11        |
| 1455869_at   | BG862223      | Mm.458283 | calcium/calmodulin- dependent protein kinase II, beta   | 95.4      | 8         | 0.13        |
| 1419025_at   | NM_009118     | Mm.1276   | retinal S-antigen                                       | 246.7     | 42.8      | 0.16        |
| 1438758_at   | AU046270      | Mm.291504 | acireductone dioxygenase 1                              | 129.4     | 20.1      | 0.16        |
| 1435197_at   | BE993443      | Mm.477577 | POU domain, class 3, transcription factor 3             | 31.1      | 5.4       | 0.18        |
| 1451255_at   | BC004672      | Mm.4067   | lipolysis stimulated lipoprotein receptor               | 33.8      | 12        | 0.19        |
| 1439143_at   | BB312992      | Mm.285300 | RIKEN cDNA A930018M24 gene                              | 28        | 3.7       | 0.19        |
| 1437121_at   | BB168293      | Mm.284447 | DENN/MADD domain containing 1C                          | 40.1      | 9         | 0.23        |
| 1449578_at   | AW536705      | Mm.479197 | suppressor of Ty 16 homolog (S. cerevisiae)             | 157.7     | 41.5      | 0.27        |
| 1435205_at   | C88013        | Mm.331881 | transcription factor AP-2, epsilon                      | 61.4      | 14.6      | 0.27        |
| 1418726_a_at | NM_011619     | Mm.247470 | troponin T2, cardiac                                    | 47.5      | 15.6      | 0.33        |
| 1419740_at   | NM_008806     | Mm.1372   | phosphodiesterase 6B, cGMP, rod receptor, beta          | 36.5      | 10.8      | 0.38        |
| 1423631_at   | BB540797      | Mm.103641 | nuclear receptor subfamily 2, group E, member 3         | 179.3     | 76.3      | 0.38        |
| 1434369_a_at | AV016515      | Mm.178    | crystallin, alpha B                                     | 183.1     | 72.6      | 0.38        |
| 1429024_at   | AK003783      | Mm.479259 | RNA binding motif protein 20                            | 96.7      | 50.8      | 0.38        |
| 1425900_at   | BC016235      | Mm.213213 | hexokinase domain containing 1                          | 277.4     | 149.7     | 0.41        |
| 1427536_at   | AI615965      | Mm.442631 | predicted gene 10330 /// zinc finger protein 125        | 49.8      | 12.9      | 0.41        |
| 1441899_x_at | BB335613      | Mm.4598   | brevican                                                | 57.9      | 13.9      | 0.41        |
| 1425892_a_at | D50055        | Mm.16347  | prepronociceptin                                        | 58.9      | 28.7      | 0.44        |
| 1431581_at   | AK013705      | ---       | RIKEN cDNA 4922502B01 gene                              | 99.6      | 45.9      | 0.44        |
| 1441107_at   | BB292639      | Mm.32825  | doublesex and mab-3 related TF like family A2           | 22        | 14.9      | 0.44        |
| 1444687_at   | BB804635      | Mm.337409 | complement component 1, q subcomponent-like 2           | 56.4      | 26.3      | 0.44        |
| 1424865_at   | BC010821      | Mm.46248  | peptide YY                                              | 35        | 12.4      | 0.47        |
| 1425288_at   | BC026991      | Mm.477583 | sterile alpha motif domain containing 11                | 85.8      | 43        | 0.47        |
| 1427004_at   | BB311718      | Mm.262287 | F-box protein 2                                         | 26.8      | 11.9      | 0.47        |
| 1450680_at   | NM_009019     | Mm.828    | recombination activating gene 1                         | 44.8      | 20.1      | 0.47        |
| 1450946_at   | BG298773      | Mm.20422  | neural retina leucine zipper gene                       | 632.8     | 289       | 0.47        |
| 1429945_at   | AK013012      | Mm.153585 | kelch-like 35 (Drosophila)                              | 27.9      | 15.1      | 0.47        |
| 1442120_at   | AA153229      | ---       | RIKEN cDNA G730007D18 gene                              | 45.6      | 19.2      | 0.47        |



## B

| Probe-set    | Accession No. | Unigene   | Gene                                                                                | WT signal | KO signal | Fold change |
|--------------|---------------|-----------|-------------------------------------------------------------------------------------|-----------|-----------|-------------|
| 1439113_at   | BB379753      | Mm.327413 | RIKEN cDNA 2410018L13 gene                                                          | 24.2      | 91.1      | 4.9         |
| 1427820_at   | BC021831      | Mm.466733 | ---                                                                                 | 47.4      | 159.7     | 4.0         |
| 1415801_at   | M63801        | Mm.378921 | gap junction protein, alpha 1                                                       | 39.2      | 132.6     | 3.4         |
| 1422674_s_at | NM_007775     | Mm.440053 | crystallin, gamma B /// crystallin, gamma C                                         | 24.2      | 88.3      | 3.0         |
| 1436115_at   | BB829749      | Mm.81916  | predicted gene 266                                                                  | 28.6      | 87.3      | 3.0         |
| 1437726_x_at | BB111335      | Mm.2570   | complement component 1, q subcomponent, beta                                        | 35.7      | 96        | 3.0         |
| 1429948_x_at | AK013953      | Mm.275362 | crystallin, gamma F                                                                 | 20.7      | 95.6      | 3.0         |
| 1436127_at   | AI854101      | Mm.316614 | corticotropin releasing hormone binding protein                                     | 156.9     | 474.7     | 3.0         |
| 1422652_at   | NM_007774     | Mm.26904  | crystallin, gamma A                                                                 | 25.8      | 93.7      | 2.8         |
| 1449401_at   | NM_007574     | Mm.439732 | complement component 1, q subcomponent, C chain                                     | 26.5      | 67.3      | 2.8         |
| 1426314_at   | BB770914      | Mm.229532 | endothelin receptor type B                                                          | 53.5      | 157.7     | 2.8         |
| 1450796_at   | NM_016864     | Mm.228661 | atonal homolog 7 (Drosophila)                                                       | 179.6     | 419.2     | 2.6         |
| 1417381_at   | NM_007572     | Mm.439957 | complement component 1, q subcomponent, alpha                                       | 33.8      | 85.6      | 2.6         |
| 1446950_at   | BM124834      | Mm.87051  | thymocyte selection-associated HMG box gene                                         | 23.8      | 60        | 2.6         |
| 1456659_at   | BM116906      | ---       | hypothetical LOC552902<br>non-catalytic region of tyrosine kinase adaptor protein 2 | 27.2      | 69.2      | 2.6         |
| 1458432_at   | BE948993      | Mm.447891 | 2                                                                                   | 21.5      | 57.6      | 2.6         |
| 1423754_at   | BC010291      | Mm.141021 | interferon induced transmembrane protein 3                                          | 25.2      | 65.7      | 2.6         |
| 1443337_at   | BB531021      | Mm.448265 | glutamate receptor interacting protein 1                                            | 22.5      | 46.5      | 2.6         |
| 1445874_at   | BB470735      | Mm.439301 | ---                                                                                 | 72.1      | 208       | 2.6         |
| 1438754_at   | AV372127      | ---       | ---                                                                                 | 26.8      | 69.1      | 2.6         |
| 1431335_a_at | AK018575      | Mm.87599  | WAP four-disulfide core domain 1                                                    | 44.2      | 120.6     | 2.6         |
| 1460208_at   | NM_007993     | Mm.271644 | fibrillin 1                                                                         | 44.4      | 82.1      | 2.4         |
| 1445561_at   | BM218868      | Mm.413457 | ---                                                                                 | 25.6      | 56.4      | 2.4         |
| 1421141_a_at | BG962849      | Mm.234965 | forkhead box P1                                                                     | 22.2      | 60.4      | 2.4         |
| 1427183_at   | BC023060      | Mm.44176  | EGF-containing fibulin-like extracellular matrix protein 1                          | 85.6      | 253.9     | 2.4         |
| 1441577_at   | BB419140      | ---       | RIKEN cDNA C530014P21 gene                                                          | 22.2      | 29.9      | 2.4         |
| 1437165_a_at | BB250811      | Mm.262345 | procollagen C-endopeptidase enhancer protein                                        | 24.8      | 64.9      | 2.4         |
| 1436905_x_at | BB218107      | Mm.271868 | lysosomal-associated protein transmembrane 5                                        | 26.7      | 64.7      | 2.4         |
| 1452892_at   | AK014819      | Mm.389950 | serine/threonine kinase 33                                                          | 23.3      | 52        | 2.4         |
| 1453145_at   | AK007420      | Mm.247625 | phosphatidylserine decarboxylase, pseudogene 3                                      | 47        | 112.2     | 2.4         |
| 1417643_at   | NM_025290     | Mm.12743  | radial spoke head 1 homolog (Chlamydomonas)                                         | 92.7      | 215.2     | 2.3         |
| 1448591_at   | NM_021281     | Mm.3619   | cathepsin S                                                                         | 113.8     | 196.2     | 2.3         |
| 1421375_a_at | NM_011313     | Mm.100144 | S100 calcium binding protein A6 (calcyclin)                                         | 33.6      | 68.7      | 2.3         |
| 1449470_at   | NM_010053     | Mm.475101 | distal-less homeobox 1                                                              | 32.2      | 62.2      | 2.3         |
| 1458721_at   | BG073332      | Mm.247203 | Protocadherin gamma cluster                                                         | 24.3      | 50.3      | 2.3         |
| 1426607_at   | BG068672      | Mm.46679  | predicted gene 7120                                                                 | 86.4      | 171.7     | 2.3         |

|              |           |           |                                                                 |       |       |     |
|--------------|-----------|-----------|-----------------------------------------------------------------|-------|-------|-----|
| 1460133_at   | BF607205  | Mm.450032 | ephrin A5                                                       | 21.8  | 61.4  | 2.3 |
| 1459731_at   | BE996194  | ---       | ---                                                             | 25.3  | 63.7  | 2.3 |
| 1446708_at   | BB486740  | Mm.135110 | hypoxia inducible factor 3, alpha subunit                       | 29.2  | 63.8  | 2.3 |
| 1443175_at   | BB466434  | ---       | RIKEN cDNA A830010M09 gene                                      | 22.9  | 66.3  | 2.3 |
| 1444345_at   | AW123227  | Mm.463057 | ---                                                             | 23    | 55.9  | 2.3 |
| 1457111_at   | AV318727  | ---       | expressed sequence AA415038                                     | 26.9  | 55.9  | 2.3 |
| 1421011_at   | NM_053262 | Mm.46019  | hydroxysteroid (17-beta) dehydrogenase 11                       | 27    | 63.7  | 2.1 |
| 1418455_at   | NM_019877 | Mm.22144  | coatamer protein complex, subunit zeta 2                        | 27.6  | 55.9  | 2.1 |
| 1419665_a_at | NM_019738 | Mm.18742  | nuclear protein 1                                               | 49.2  | 120.1 | 2.1 |
| 1422903_at   | NM_010745 | Mm.2639   | lymphocyte antigen 86                                           | 38    | 71.1  | 2.1 |
| 1417962_s_at | NM_010284 | Mm.3986   | growth hormone receptor                                         | 63.3  | 169   | 2.1 |
| 1448877_at   | NM_010054 | Mm.3896   | distal-less homeobox 2                                          | 25.1  | 47.1  | 2.1 |
| 1421385_a_at | NM_008663 | Mm.1403   | myosin VIIA                                                     | 38.4  | 79.2  | 2.1 |
| 1417346_at   | BG084230  | Mm.24163  | PYD and CARD domain containing                                  | 37.9  | 76.2  | 2.1 |
| 1444349_at   | BG071091  | ---       | ---                                                             | 33.6  | 72.7  | 2.1 |
| 1452114_s_at | BF225802  | Mm.405761 | insulin-like growth factor binding protein 5                    | 157.7 | 331.4 | 2.1 |
| 1442109_at   | BE989344  | Mm.445031 | hypoxia inducible factor 3, alpha subunit                       | 31.7  | 61.1  | 2.1 |
| 1422882_at   | BE333485  | Mm.246304 | synaptophysin-like protein                                      | 24.4  | 58    | 2.1 |
| 1417625_s_at | BC015254  | Mm.6522   | chemokine (C-X-C motif) receptor 7                              | 46.1  | 104.1 | 2.1 |
| 1450020_at   | BC012653  | Mm.44065  | chemokine (C-X3-C) receptor 1                                   | 26.3  | 39.5  | 2.1 |
| 1452141_a_at | BC001991  | Mm.392203 | selenoprotein P, plasma, 1                                      | 212.5 | 484.9 | 2.1 |
| 1436098_at   | BB667452  | Mm.250719 | butyrylcholinesterase                                           | 21.1  | 47.4  | 2.1 |
| 1436714_at   | BB297498  | Mm.209385 | LIM domain containing preferred translocation partner in lipoma | 43.2  | 82.9  | 2.1 |
| 1458408_at   | BB160137  | Mm.102765 | sterile alpha motif domain containing 8                         | 28.9  | 59.8  | 2.1 |
| 1435888_at   | AV369812  | Mm.420648 | epidermal growth factor receptor                                | 62.2  | 125.8 | 2.1 |
| 1456312_x_at | AV224521  | Mm.21109  | gelsolin                                                        | 23.8  | 72.2  | 2.1 |
